# Supplementary material for: MET∆14 promotes a ligand-dependent, AKT-driven invasive growth
Source: Life Sci Alliance. 2022 May 30;5(10):e202201409. doi: 10.26508/lsa.202201409 (PMC9152130; doi:10.26508/lsa.202201409)
Supplement: Supplementary file 21 [file LSA-2022-01409_TableS2.xlsx]

## Sheet: Sheet1
Gene Symbol	Taqman Assay ID (Thermo Scientific®)
DDIT3	Hs00358796_g1
TIMP3	Hs00165949_m1
ATF3	Hs00231069_m1
CD14	Hs00169122_g1
IL6	Hs00985639_m1
GADD45A	Hs00169255_m1
CXCL8	Hs00174103_m1
MMP1	Hs00233958_m1
SERPINE1	Hs01126606_m1
CDH1	Hs00170423_m1
TJP1	Hs01551861_m1
CDC45	Hs00185895_m1
CCNA2	Hs00153138_m1
AURKA	Hs00269212_m1
TOP2A	Hs00172214_m1
E2F1	Hs00153451_m1
AURKB	Hs00945855_g1
MET	Hs01565584_m1
TBP	Hs99999910_m1
18S	Hs99999901_s1
